# Supplementary material for: Nicotinamide fumaric acid supramolecular cocrystals: diversity of stoichiometry
Source: Royal Society of Chemistry journal article supplement (doi:10.1039/b818667g), 2009-01-01
Supplement: b818667g.pdf [file b818667g.pdf]

## Electronic Supplementary Information

### Nicotinamide fumaric acid supramolecular cocrystals: diversity of stoichiometry

Liana Orola and Mikelis V. Veidis\*

*Faculty of Chemistry, University of Latvia, Kr. Valdemara 48, Riga, Latvia, LV-1013. Fax: +371*

*6737 8736; Tel: +371 6737 8718; E-mail: veidis@lu.lv*

#### Characterization by powder X-ray diffraction

X-ray powder diffraction (XRPD) patterns of **nic-fa** (1:1) and **nic-fa** (2:1) were determined using a Bruker AXS D8 Advance powder diffractometer with Cu K $\alpha$  radiation ( $\lambda=1.5418$  Å).

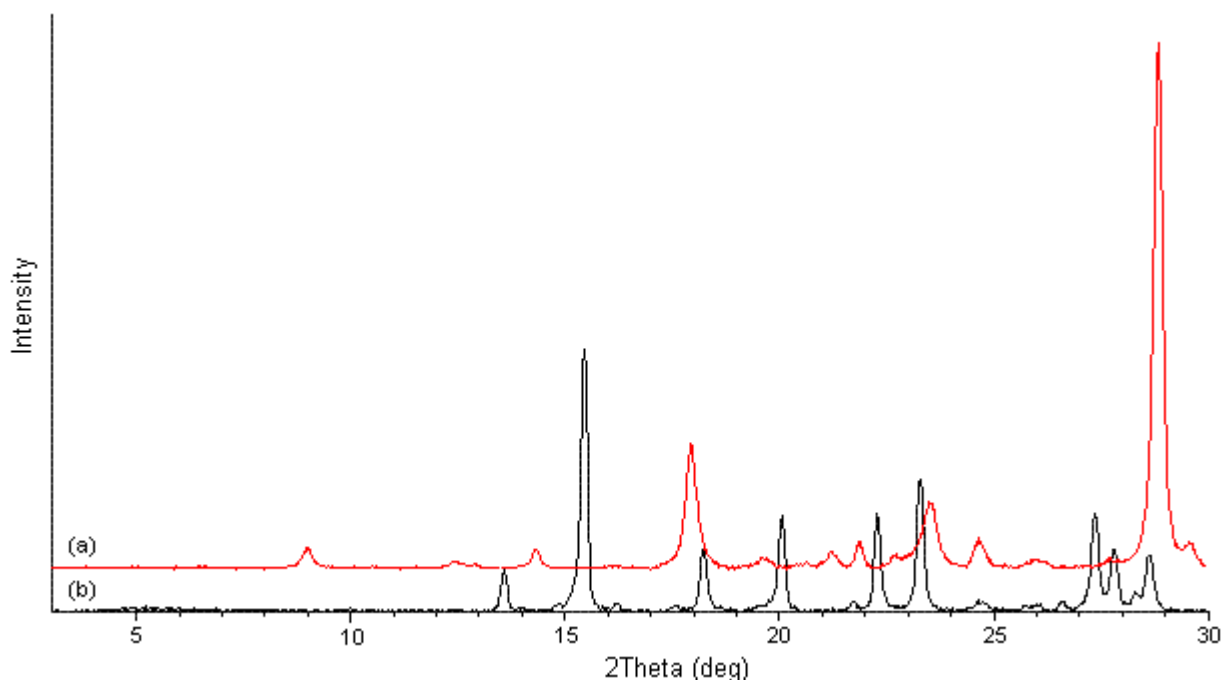

**Figure S1** Powder X-ray diffraction pattern of a) **nic-fa** (1:1) and b) **nic-fa** (2:1). Both synthesized by ethanol solvent-drop grinding.

#### Characterization by DTA/TG analysis

DTA/TG analysis was performed using Seiko Exstar6000 TG/DTA6300 equipment.

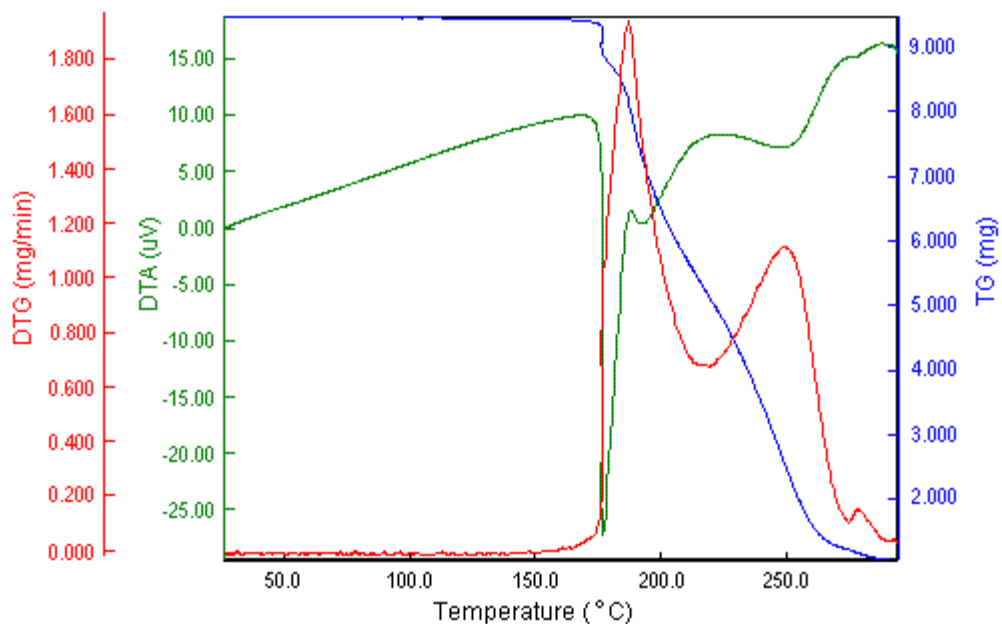

**Figure S2** DTA/TG curve of **nic-fa** (1:1).

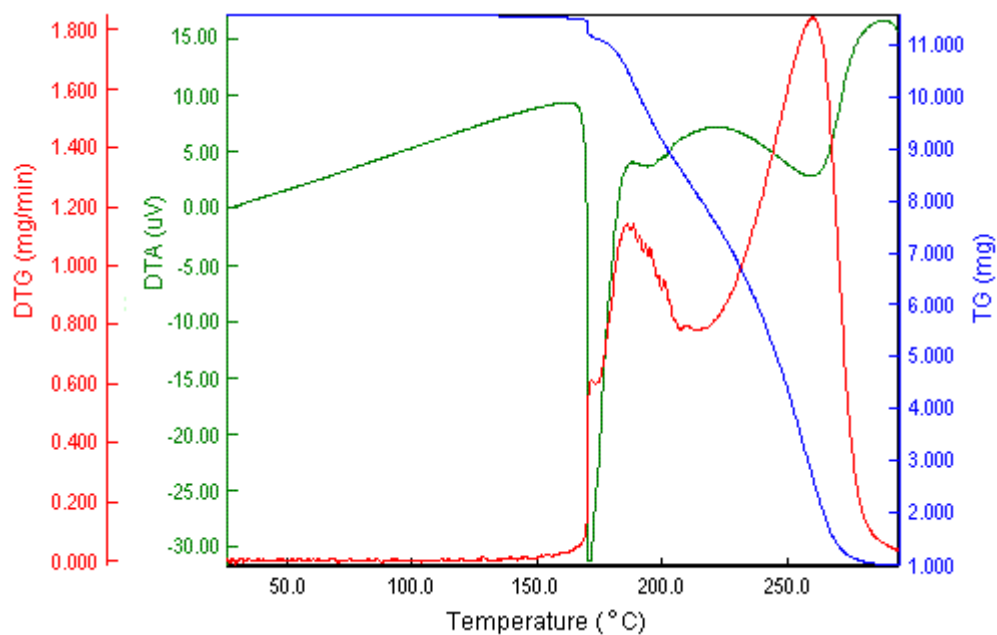

**Figure S3** DTA/TG curve of **nic-fa** (2:1).
